# Supplementary material
Source: PubMed Central journal article supplement (PMC8163055)
Supplement: kfab027_supplementary_data.pdf [file kfab027_supplementary_data.pdf]

## Supplemental Material

### FXR-Deoxycholic Acid-TNF $\alpha$ Axis Modulates Acetaminophen-Induced Hepatotoxicity

Tingting Yan, Nana Yan, Hong Wang, Tomoki Yagai, Yuhong Luo, Shogo Takahashi, Min Zhao, Kristopher W. Krausz, Guangji Wang, Haiping Hao, Frank J. Gonzalez

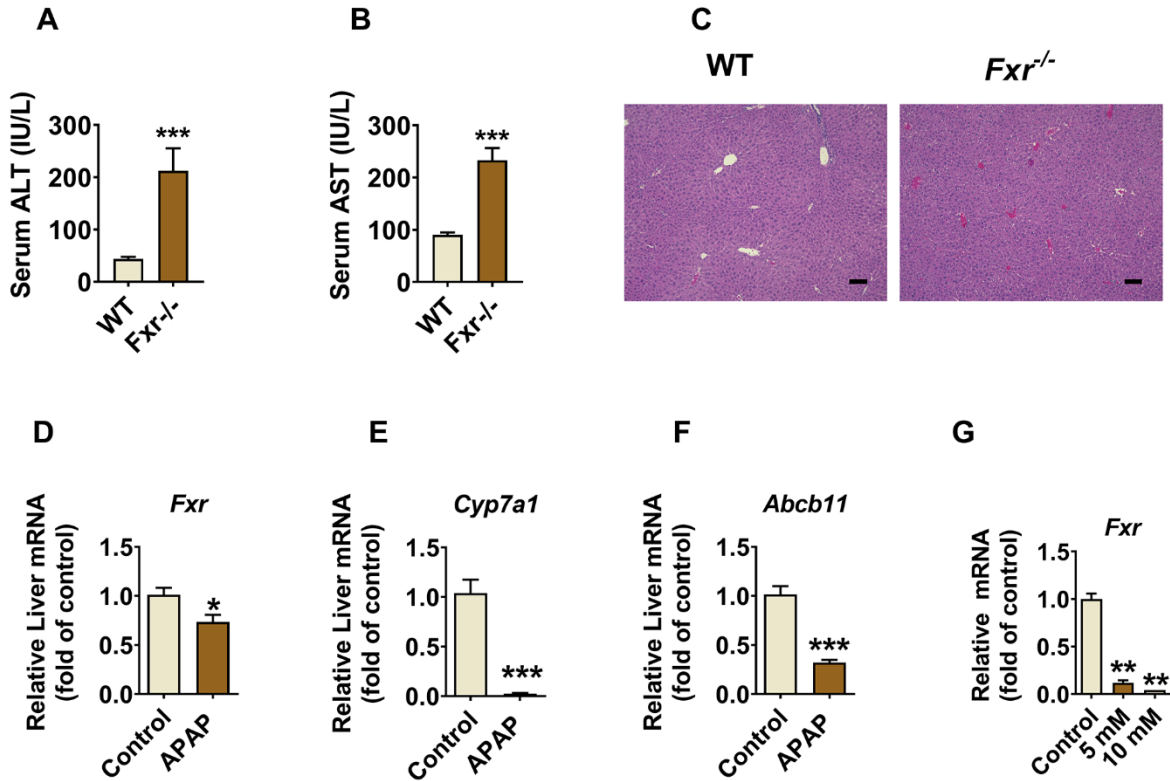

**Supplementary Figure 1:** Hepatic function parameters of untreated global *Fxr*<sup>-/-</sup> mice and effect of APAP in hepatic FXR signaling. A-C, Serum ALT levels and AST levels of untreated control global *Fxr*<sup>-/-</sup> mice and WT mice. C, Liver H&E staining for untreated control WT mice and *Fxr*<sup>-/-</sup> mice, scale bar 50  $\mu$ m. D-F, mRNA levels of genes, *Fxr*, *Cyp7a1*, *Abcb11* in APAP-treated livers; D, *Fxr* mRNA levels in primary mouse hepatocytes treated with 0 (Control), 5 mM or 10 mM of APAP. \* $P < 0.05$ , \*\* $P < 0.01$  and \*\*\* $P < 0.005$  compared with the control group. *Abcb11*, ATP binding cassette subfamily B member 11.

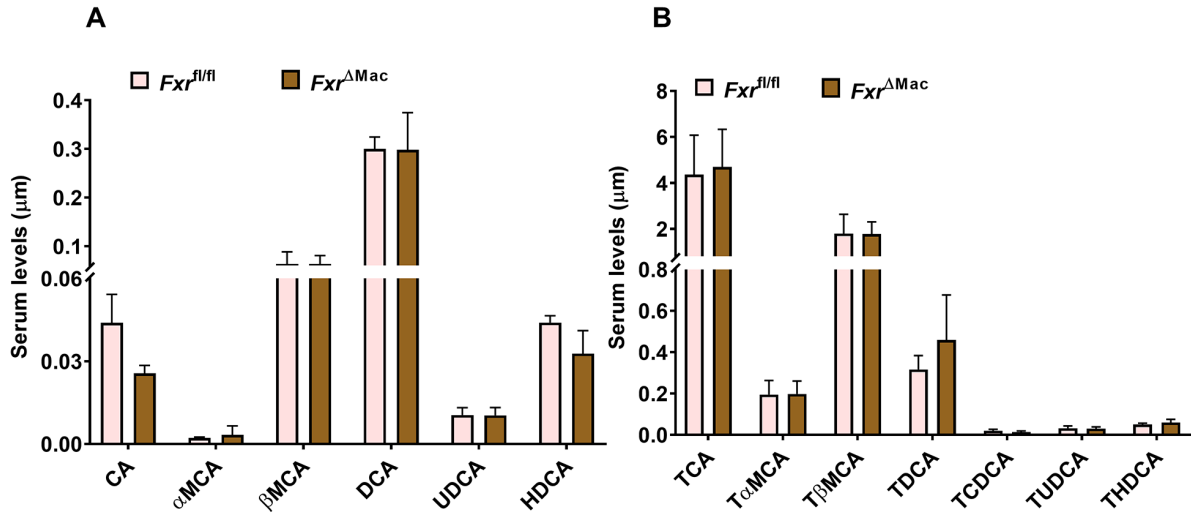

**Supplementary Figure 2:** Bile acid levels showed no significant difference between *Fxr*<sup>ΔMac</sup> and *Fxr*<sup>fl/fl</sup> mice after APAP dosing. A, serum-free bile acids after APAP dosing. B, serum-conjugated bile acids after APAP dosing. N=5 mice per group. Data are presented as means ± SEM. Full names of abbreviated bile acids were listed in the Figure 4 legend.

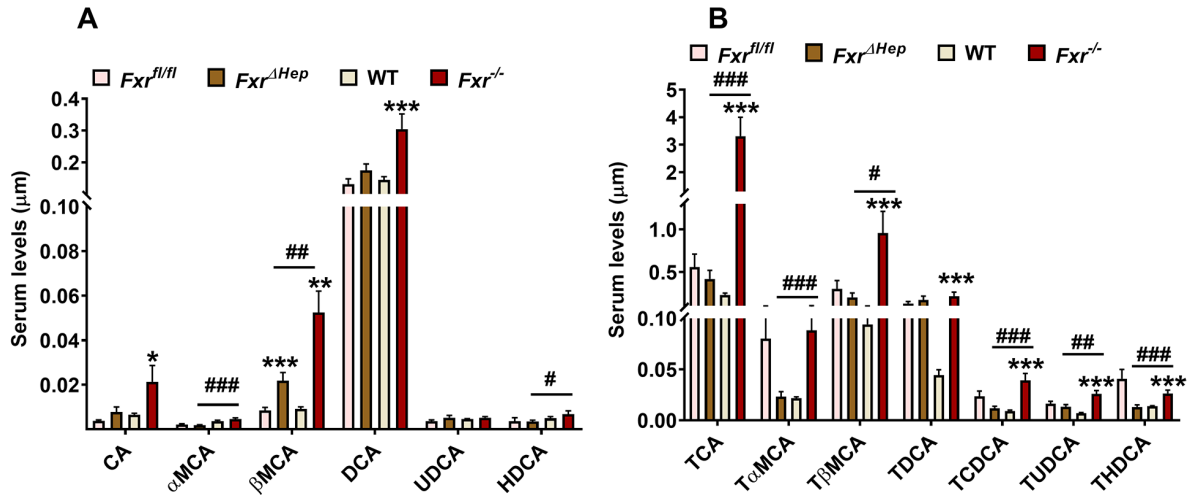

**Supplementary Figure 3:** Bile acid levels were more significantly accumulated in untreated control global *Fxr<sup>-/-</sup>* mice than in *Fxr<sup>ΔHep</sup>* mice. A, basic serum free bile acids. B, basic serum conjugated bile acids. N=5 mice per group. Data are presented as means ± SEM. \*P<0.05, \*\*P<0.01 and \*\*\*P<0.005 compared with the WT group. #P<0.05, ###P<0.01 and ####P<0.005 compared with the *Fxr<sup>ΔHep</sup>* group. Full names of abbreviated bile acids were listed in Figure 4 legend.

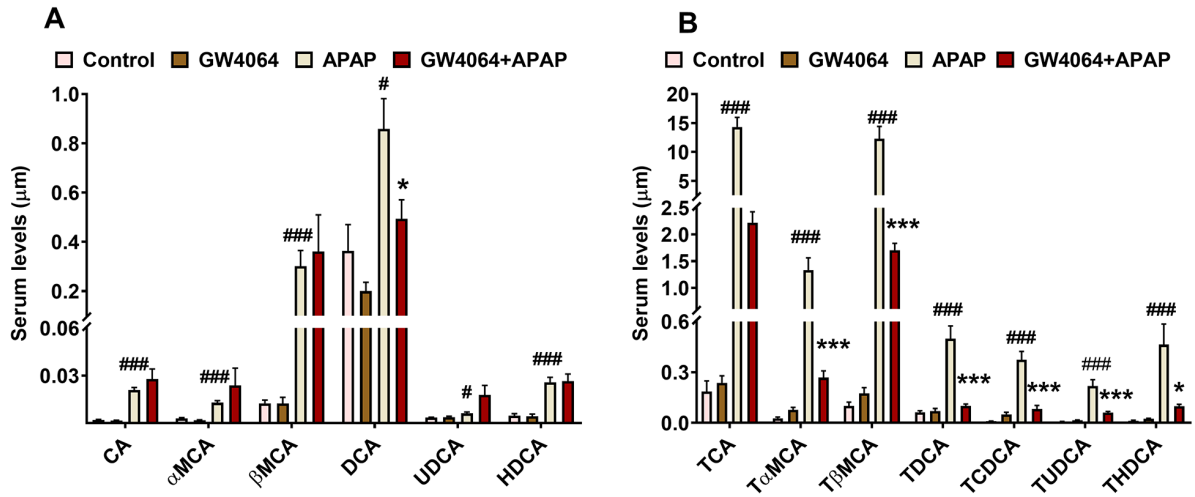

**Supplementary Figure 4:** Bile acid levels were decreased in GW4064/APAP-treated WT mice. A, serum free bile acids. B, serum conjugated bile acids. N=5 mice per group. Data are presented as means  $\pm$  SEM. \* $P$ <0.05, \*\* $P$ <0.01 and \*\*\* $P$ <0.005 compared with the APAP group. # $P$ <0.05, ## $P$ <0.01 and ### $P$ <0.005 compared with the control group. Full names of abbreviated bile acids were listed in the Figure 4 legend.

**Supplementary Table 1.** List of primers:

| Primers       | Forward 5'-3'          | Reverse 5'-3'          |
|---------------|------------------------|------------------------|
| <i>Actb</i>   | AAGTGCTTCTAGGCGGACTGTT | TTTTCTGCGCAAGTTAGGTTTG |
| <i>Abcb11</i> | AAGGACAGCCACACCAACTC   | TGGATCAACAGCTCCTTCAA   |
| <i>Fxr</i>    | CTGAGAACCCGCAGCATTTC   | GAGCGGGGTGAACTTGTGAT   |
| <i>Cyp7a1</i> | GCTGTCCGGATATTCAAGGA   | AGCTCAGCTCTGGAGGGAAT   |
| <i>Tnfa</i>   | CCACCACGCTCTTCTGTCTAC  | AGGGTCTGGGCCATAGAACT   |
